# Supplementary material for: Postpartum diagnosis demonstrates a high risk for metastasis and merits an expanded definition of pregnancy-associated breast cancer
Source: Springer Nature journal article supplement (doi:10.1007/s10549-013-2437-x), 2013-02-21
Supplement: MOESM1 [file 8845156]

**Supplemental Material-Callihan and Borges**

**Table 6**. Covariate risk estimates in adjusted distant recurrence (DR) model

**Table 7.**  Covariate risk estimates in adjusted overall survival (OS) model

**Table 8**. Clinical characteristics of cases diagnosed ≥5 years collapsed (n=277)

**Table 6**. Covariate risk estimates in adjusted distant recurrence (DR) model

| *Covariate* | *HR* | *95% CI* | *P* |
| --- | --- | --- | --- |
| *Biologic Subtype*  Luminal A (n=166) | 1.0 | --- | --- |
| Luminal B (n=56) | 0.83 | 0.32-2.10 | 0.69 |
| Her2 neu Positive (n=37) | 3.07 | 1.35-7.01 | 0.008 |
| Triple Negative (n=67) | 3.87 | 1.88-7.99 | <.001 |
| *Stage* |  |  |  |
| I (n=92) | 1.0 | --- | --- |
| II (n=164) | 2.41 | 0.98-5.92 | 0.05 |
| III(n=70) | 4.79 | 1.84-12.46 | 0.001 |
| *Date of Diagnosis* |  |  |  |
| <1999 | 4.29 | 1.32-13.92 | 0.02 |
| 1999—<2004 | 1.59 | 0.50-5.05 | 0.44 |
| 2004— <2008 | 1.08 | 0.31-3.79 | 0.90 |
| 2008—present | 1.0 | --- | --- |

**Table 7.**  Covariate risk estimates in adjusted overall survival (OS) model

| *Covariate* | *HR* | *95% CI* | *P* |
| --- | --- | --- | --- |
| *Biologic Subtype* |  |  |  |
| Luminal A (n=170) | 1.0 | --- | --- |
| Luminal B (n=57) | 0.93 | 0.39-2.22 | 0.86 |
| Her2 neu Positive (n= 40) | 2.52 | 1.11-5.69 | 0.03 |
| Triple Negative (n=67) | 5.14 | 2.49-10.60 | <.001 |
| *Stage* |  |  |  |
| I (n=90) | 1.0 | --- | --- |
| II (n=161) | 2.55 | 0.96-6.75 | 0.06 |
| III (n=68) | 4.67 | 1.68-13.00 | <.001 |
| IV (n=15) | 18.94 | 5.85-61.29 | <.001 |
| *Date of Diagnosis* |  |  |  |
| <1999 | 3.55 | 0.75-16.89 | 0.11 |
| 1999—<2004 | 1.56 | 0.33-7.42 | 0.58 |
| 2004— <2008 | 1.53 | 0.31-7.64 | 0.60 |
| 2008—present | 1.0 | --- | --- |

**Table 8**. Clinical characteristics of cases diagnosed ≥5 years collapsed in multivariate models

|  | *Parous ≥5*  (N=277)  No. (%) |
| --- | --- |
| *Histologic Subtype*  Ductal  Lobular  Ductal + Lobular  Inflammatory  Other  Missing | 230 ( 83.03)  22( 7.94)  11 (3.97)  6 (2.17)  3 (1.08)  5 (1.81) |
| *Biologic Subtype*  Luminal A  Luminal B  Her2 neu Positive  Triple Negative  Missing Her 2 neu**a**  Missing ER or PR | 96 (34.66)  31 (11.19)  25 (9.03)  41 (14.80)  58 (20.93)  26 (9.39) |
| *Histologic Grade*  Grade I  Grade II  Grade III  Missing | 32 (11.55)  99 (35.74)  117 (42.24)  29 (10.47) |
| *Tumor Size*  0.1—≤ 2.0 cm  >2.0—≤5.0 cm  >5.0 cm  Missing | 111(40.07)  104 (37.54)  45 (16.25)  17 (6.14) |
| *Stage*  0  I  II  III  IV  Missing | 8 (2.89)  66 (23.83)  119 (42.96)  62 (22.38)  9 (3.25)  13 (4.69) |
| *Lymph node Involvement*  Positive  Negative  Missing | 135 (48.74)  137 (49.45)  5(1.81) |
| *Lymphovascular Invasion*  Present  Absent  Missing | 97 (35.02)  113 (40.79)  67 (24.19) |

aMissing Her2 neu data, reflecting unavailable Her2 neu staining or FISH analysis at diagnosis, was evenly distributed across parity groups and thus is not anticipated to confound results
